# Supplementary material for: Impact of elective frozen vs. fresh embryo transfer strategies on cumulative live birth: Do deleterious effects still exist in normal & hyper responders?
Source: PubMed Central journal article supplement (PMC7319321; doi:10.1371/journal.pone.0234481), 2020-06-26

24/01/2018

Bahçeci Fulya IVF Center

Ethics Committee

Application number: 38

Ethical approval was granted to Research and Development of Bahçeci Fulya IVF Center for the retrospective study "Comparison of cumulative live birth rates after freeze-all and fresh transfers".

Sincerely

Burçak Erzik, M.D.

Obstetrics and Gynecology

Bahçeci Fulya IVF Center

Op. Dr. Burçak Saygı Erzik  
Kadın Hast. ve Doğum Uzmanı  
Dip. No: 98 Ms 004

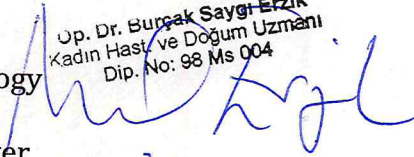

Remzi Abalı, M.D.

Obstetrics and Gynecology

Bahçeci Fulya IVF Center

Doç. Dr. Remzi Abalı  
Kadın Hastalıkları ve Doğum Uzmanı  
Dip. No: 99 Ms 003  
Diploma tescil no: 994R3

Op. Dr. Burçak Saygı Erzik  
Kadın Hast. ve Doğum Uzmanı  
Dip. No: 98 Ms 004  
Diploma tescil no: 994R3

Göçhan Güvenç Karlıkaya, M.D.

Obstetrics and Gynecology

Bahçeci Fulya IVF Center

Op. Dr. Göçhan Güvenç KARLIKAYA  
Kadın. Hast. ve Doğum Uzmanı  
58701/633



Supplement: pone.0234481.s002.pdf [file pone.0234481.s002.pdf]
